# Supplementary material
Source: PubMed Central journal article supplement (PMC3811548)
Supplement: AEM.01702-13_zam999104868so1.pdf [file AEM.01702-13_zam999104868so1.pdf]

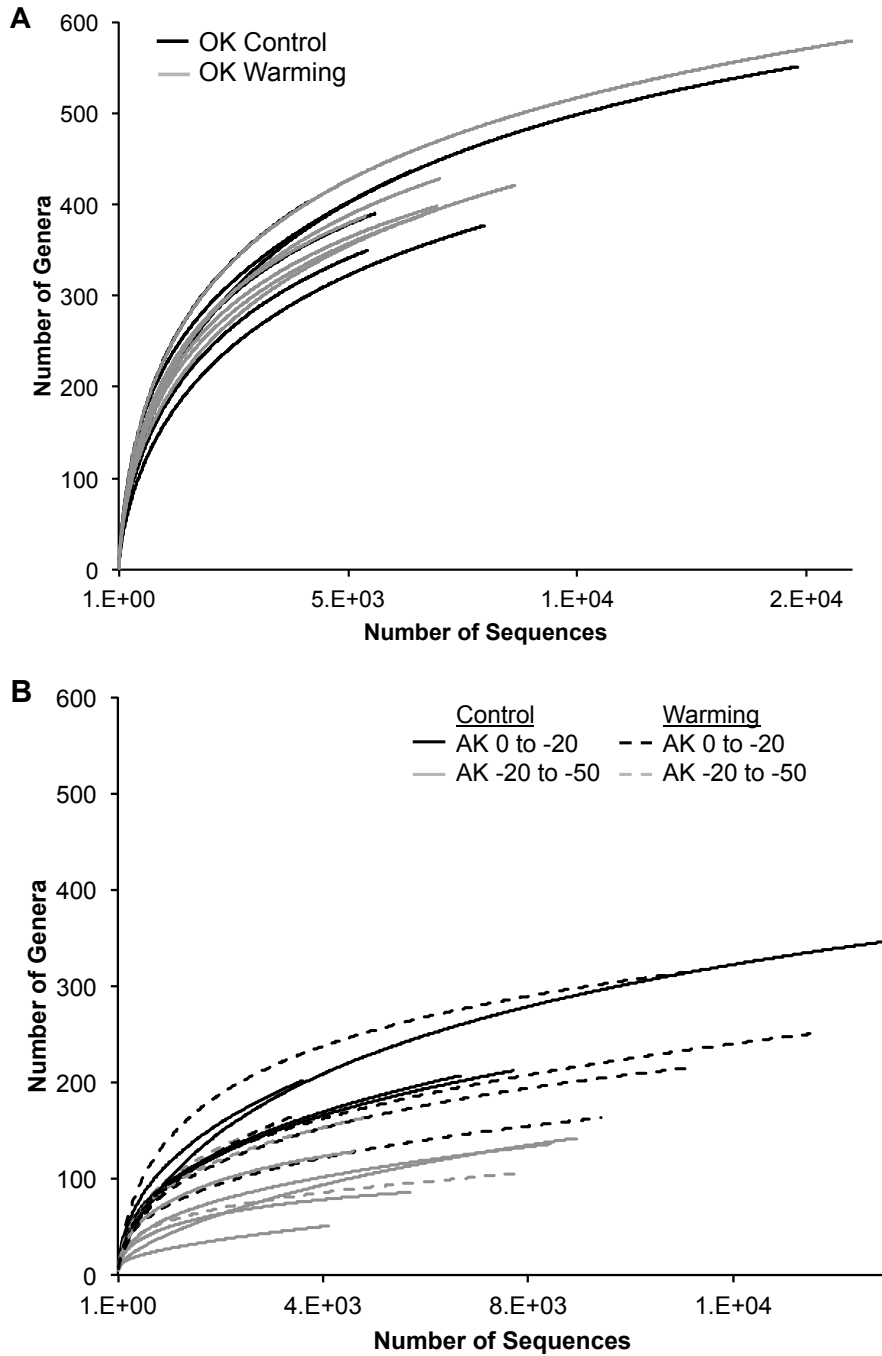

**FIG S1** Rarefaction curves using the 0% RDP Classifier confidence dataset for the (A) Oklahoma control and warming samples and (B) Alaska control and warming samples in the shallow (0 to -20 cm) and deep (-20 to -50 cm) soil layers.

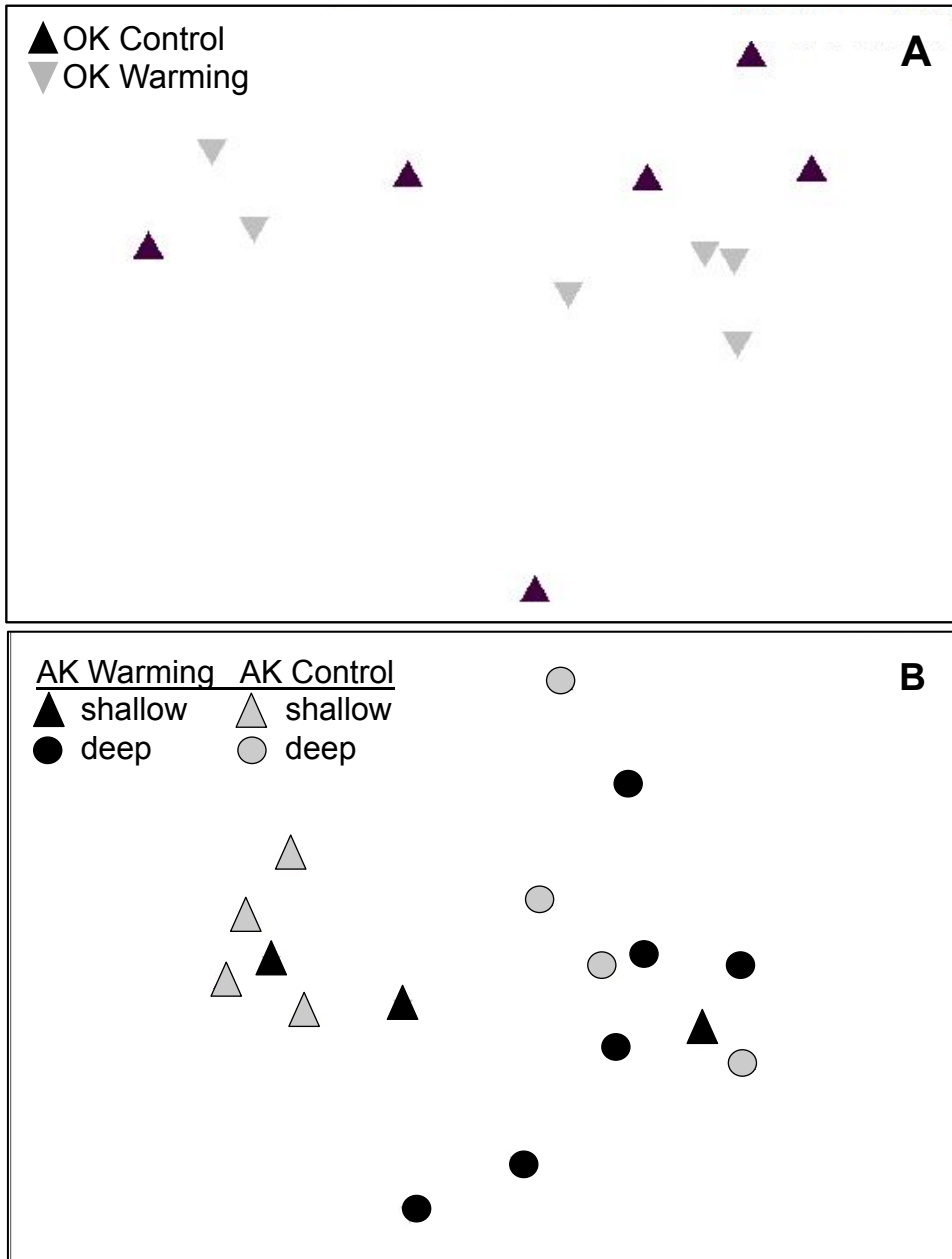

**FIG S2** NMDS ordinations based on Bray-Curtis dissimilarity matrices for (A) Oklahoma control versus warming samples (2D stress=0.07) and (B) Alaska CiPEHR samples for shallow (0 to -20 cm) versus deep (-20 to -50 cm) and warming versus control.

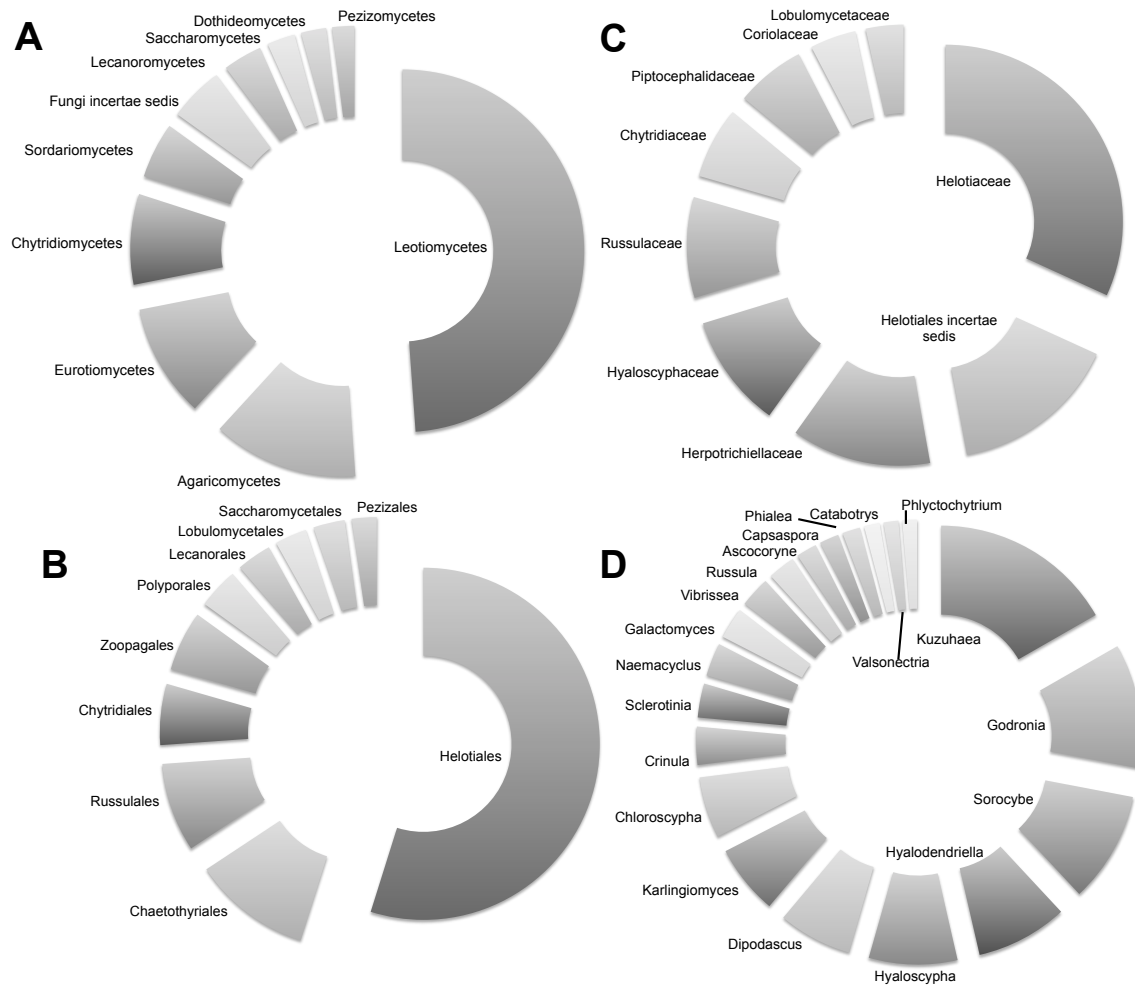

**FIG S3** Composition of the top 10 taxa at the (A) class, (B) order, (C) family levels and top 20 taxa at the (D) genus level for the shallow (0 to -20 cm) layers of the Alaska CiPEHR samples. Total percent of all sequences is (A) 90.9%, (B) 78.4%, (C) 68.9% and (D) 72.0%.

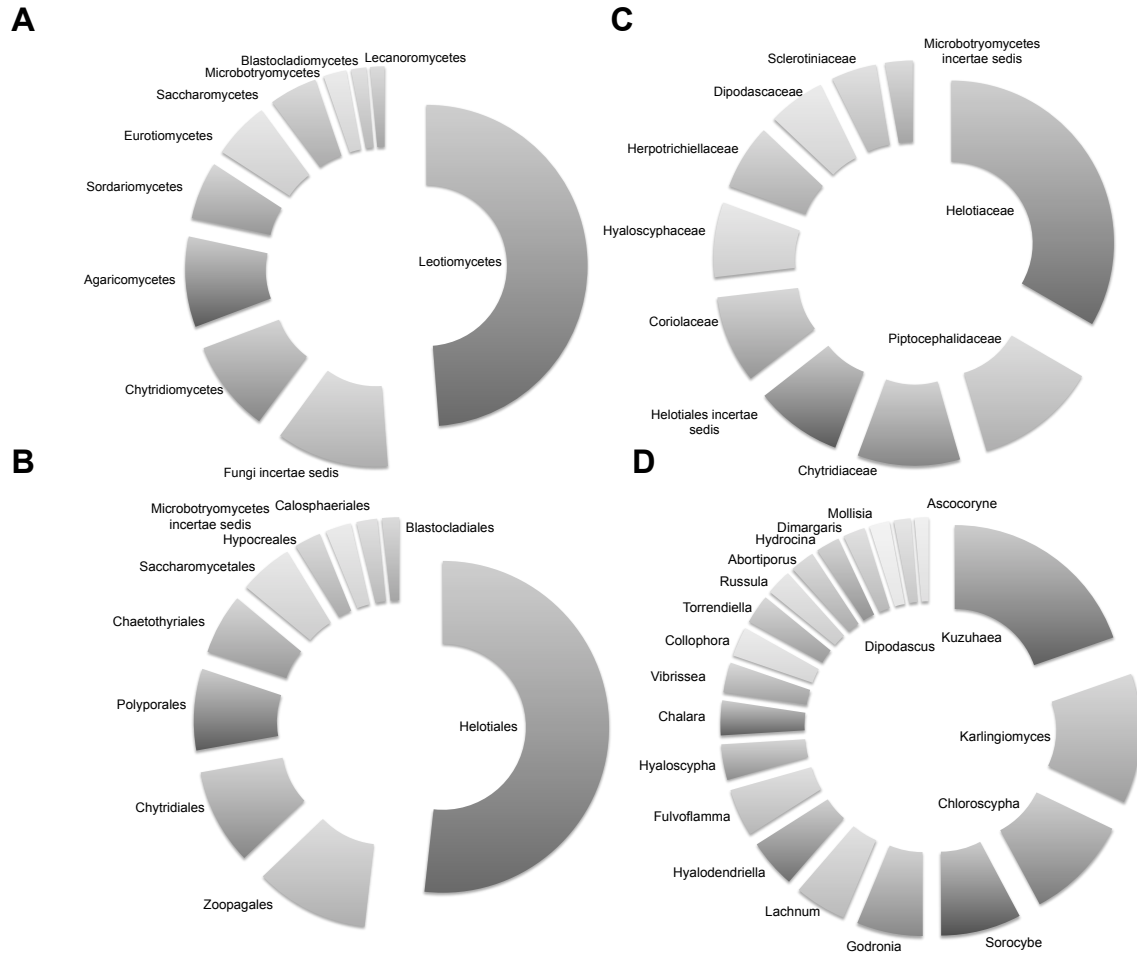

**FIG S4** Composition of the top 10 taxa at the (A) class, (B) order, (C) family levels and top 20 taxa at the (D) genus level for the deep (-20 to -50 cm) layers of the Alaska CiPEHR samples. Total percent of all sequences is (A) 90.5%, (B) 83.7%, (C) 75.8% and (D) 73.6%.

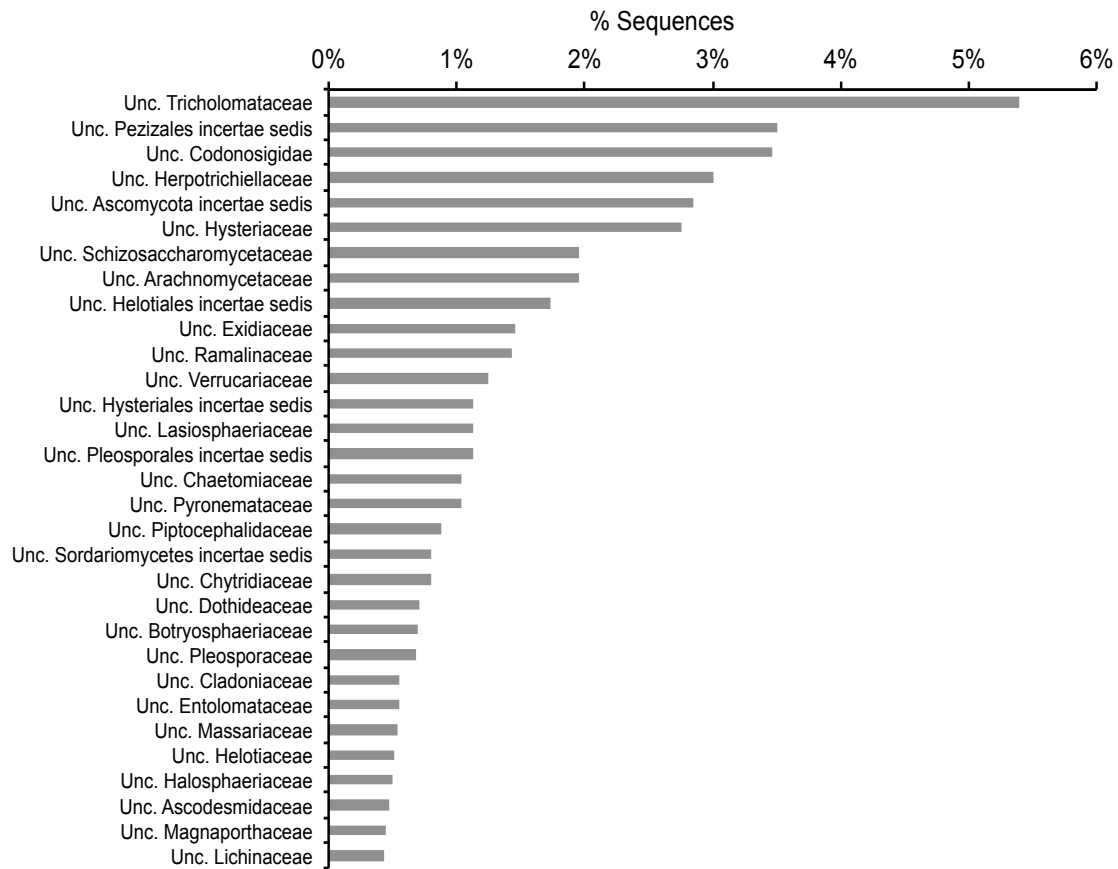

**FIG S5** Composition and relative abundance of the unclassified genera as defined by a RDP fungal classifier confidence level <50% in the Oklahoma tallgrass prairie samples within the listed unclassified family bins.

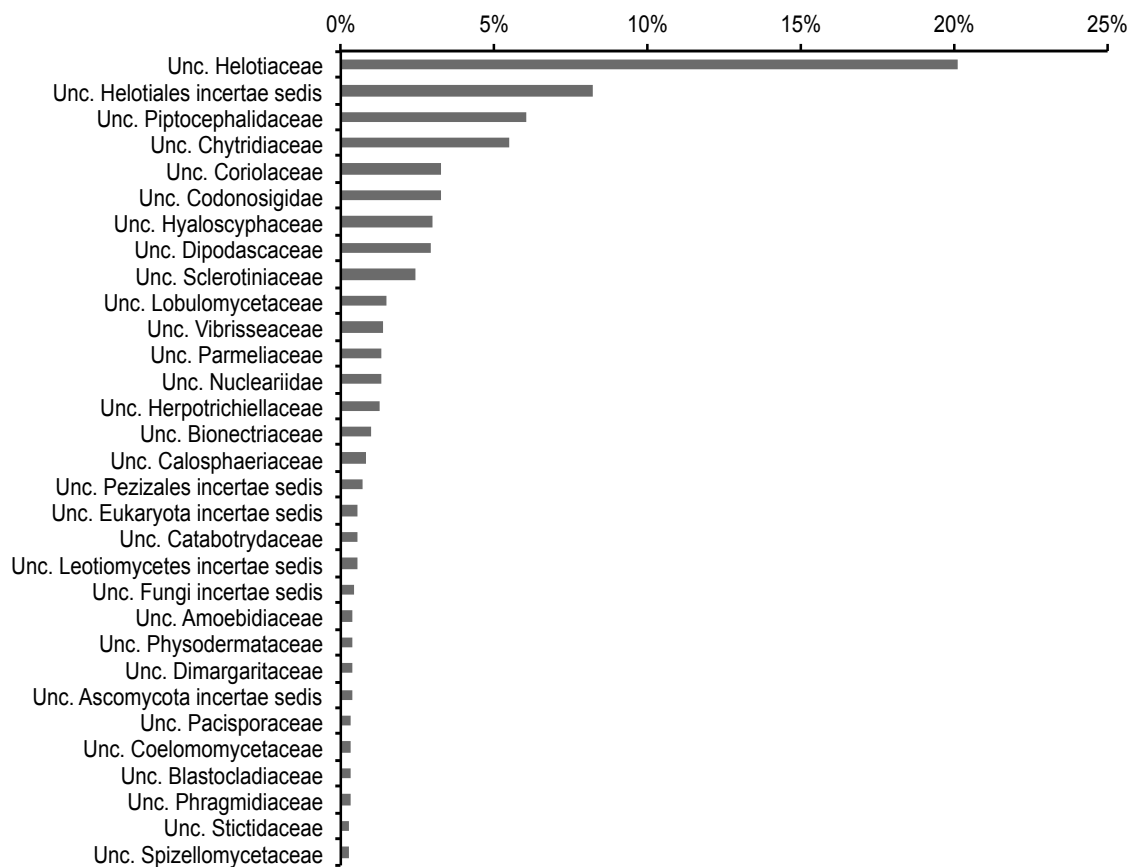

**FIG S6** Composition and relative abundance of the unclassified genera as defined by a RDP fungal classifier confidence of <50% in the Alaska samples within the listed unclassified family bins.

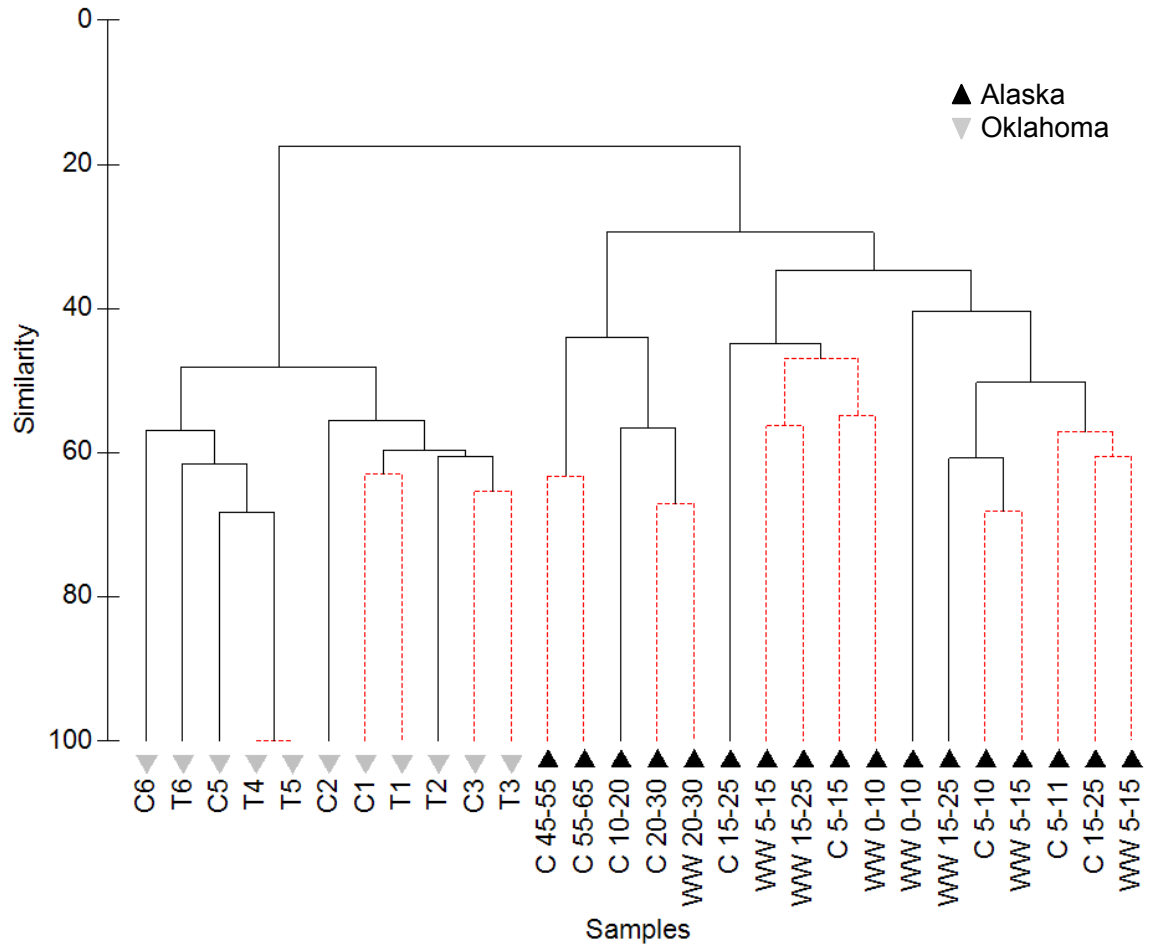

**FIG S7** Cluster analysis using complete linkage clustering with similarity profile analysis (SIMPROF) differentiating the Alaska and Oklahoma fungal communities. Solid lines indicate significant (95% confidence) cluster placement.

**TABLE S1** Average relative abundances of the most abundant fungal classes in the Alaska and Oklahoma samples. The far right column indicates the significance between treatments resulting from a two-tailed t-test. \*=P<0.05, \*\*=P<0.01.

| <b>CLASS</b>                 | <b>AK</b> | <b>OK</b> | <b>P</b> |
|------------------------------|-----------|-----------|----------|
| <b>Leotiomyces</b>           | 43%       | 5%        | **       |
| <b>Agaricomycetes</b>        | 8%        | 26%       | **       |
| <b>Eurotiomyces</b>          | 8%        | 17%       | **       |
| <b>Sordariomyces</b>         | 4%        | 15%       | **       |
| <b>Dothideomycetes</b>       | 1%        | 17%       | **       |
| <b>Lecanoromycetes</b>       | 4%        | 5%        |          |
| <b>Chytridiomycetes</b>      | 7%        | 1%        | **       |
| <b>Fungi inc. sed.</b>       | 7%        | 0%        | **       |
| <b>Saccharomycetes</b>       | 3%        | 0%        | **       |
| <b>Schizosaccharomycetes</b> | 0.0%      | 1.9%      | **       |
| <b>Blastocladiomycetes</b>   | 1%        | 1%        |          |
| <b>Taphrinomycetes</b>       | 0.2%      | 1.3%      |          |
| <b>Tremellomycetes</b>       | 0.2%      | 0.9%      |          |
| <b>Pneumocystidomycetes</b>  | 0.0%      | 1.0%      |          |
| <b>Ichthyospora</b>          | 0.5%      | 0.3%      |          |



**TABLE S2** Average relative abundances of the most abundant fungal families in the Alaska and Oklahoma samples. The far right column indicates the significance between treatments resulting from a two-tailed t-test. \*=P<0.05, \*\*=P<0.01.

| <b>ORDER</b>                   | <b>AK</b> | <b>OK</b> | <b>P</b> |
|--------------------------------|-----------|-----------|----------|
| <b>Helotiaceae</b>             | 19.6%     | 0.1%      | *        |
| <b>Trichomonascaceae</b>       | 0.0%      | 9.3%      |          |
| <b>Hyaloscyphaceae</b>         | 7.7%      | 0.7%      |          |
| <b>Herpotrichiellaceae</b>     | 8.0%      | 0.0%      |          |
| <b>Hoehnelomycetaceae</b>      | 0.0%      | 7.8%      |          |
| <b>Arthoniaceae</b>            | 0.0%      | 7.5%      |          |
| <b>Piptocephalidaceae</b>      | 6.9%      | 0.1%      |          |
| <b>Massariaceae</b>            | 0.0%      | 5.3%      | **       |
| <b>Coelomomycetaceae</b>       | 0.5%      | 3.8%      |          |
| <b>Lecanoraceae</b>            | 0.0%      | 4.2%      |          |
| <b>Hysteriales inc. sed.</b>   | 0.0%      | 3.9%      |          |
| <b>Dipodascaceae</b>           | 3.3%      | 0.0%      | **       |
| <b>Coriolaceae</b>             | 3.2%      | 0.1%      |          |
| <b>Russulaceae</b>             | 3.2%      | 0.1%      |          |
| <b>Vibrisseaceae</b>           | 1.4%      | 1.6%      |          |
| <b>Parmeliaceae</b>            | 2.4%      | 0.5%      |          |
| <b>Exobasidiaceae</b>          | 0.0%      | 2.9%      |          |
| <b>Raveneliaceae</b>           | 0.1%      | 2.1%      |          |
| <b>Schizothyriaceae</b>        | 0.0%      | 1.8%      |          |
| <b>Pleosporales inc. sed.</b>  | 0.2%      | 1.4%      |          |
| <b>Pyxidiophoraceae</b>        | 0.0%      | 1.5%      |          |
| <b>Psoraceae</b>               | 0.0%      | 1.4%      |          |
| <b>Lobulomycetaceae</b>        | 1.1%      | 0.2%      |          |
| <b>Massarinaceae</b>           | 0.0%      | 1.2%      | **       |
| <b>Leotiomycetes inc. sed.</b> | 1.0%      | 0.1%      |          |
| <b>Marasmiaceae</b>            | 0.0%      | 1.0%      |          |
| <b>Pezizales inc. sed.</b>     | 0.5%      | 0.6%      |          |
| <b>Chaetosphaerellaceae</b>    | 0.0%      | 1.0%      | **       |
| <b>Brachybasidiaceae</b>       | 0.0%      | 1.0%      |          |

**TABLE S3** Top BLAST results to the ARB-SILVA database of the RDP unclassified sequences, based on <50% classifier confidence. Percent abundances are to the total RDP unclassified sequences. BLAST percent identities are shown. \* indicates lack of presence of this genus in the current RDP fungal classifier database release 1.

|                                                    | <b>% abund.</b> | <b>% ID</b> |
|----------------------------------------------------|-----------------|-------------|
| <i>Serpula lacrymans</i>                           | 22.2%           | 91.3%       |
| <i>Cyberlindnera meyeriae</i> *                    | 22.6%           | 88.1%       |
| <i>Phaeosphaeria avenaria</i> f. sp. triticae      | 13.2%           | 92.2%       |
| <i>Passalora perplexa</i>                          | 5.1%            | 84.9%       |
| <i>Gloeophyllum abietinum</i> *                    | 3.7%            | 88.1%       |
| <i>Chytridium</i> sp. JEL341                       | 3.2%            | 96.6%       |
| <i>Nowakowskiella</i> sp. JEL127                   | 2.7%            | 88.0%       |
| <i>Sordaria macrospora</i> k-hell                  | 2.5%            | 94.1%       |
| <i>Melanoleuca melaleuca</i>                       | 2.4%            | 91.8%       |
| <i>Geomyces destructans</i> 20631-21*              | 2.1%            | 92.4%       |
| <i>Tuber melanosporum</i> (Perigord truffle)       | 3.0%            | 86.0%       |
| <i>Saccharomyces cerevisiae</i> Lalvin QA23        | 1.8%            | 81.2%       |
| <i>Puccinia striiformis</i> f. sp. tritici PST-130 | 1.6%            | 78.5%       |
| <i>Trametes versicolor</i>                         | 1.4%            | 96.2%       |
| <i>Cladochytrium replicatum</i> <sup>+</sup>       | 0.9%            | 86.1%       |
| <i>Antrodia xanthan</i>                            | 0.8%            | 93.2%       |
| <i>Arthrobotrys oligospora</i> ATCC 24927*         | 0.8%            | 87.6%       |
| <i>Kodamaea ohmeri</i>                             | 0.8%            | 84.5%       |
| <i>Epichloe festucae</i> F11                       | 0.6%            | 88.1%       |
| <i>Mycosphaerella graminicola</i> STIR04_1.1.2     | 0.6%            | 80.4%       |
| <i>Epichloe glyceriae</i> E277                     | 0.5%            | 92.6%       |
| <i>Gloeophyllum sepiarium</i>                      | 0.5%            | 86.7%       |
| <i>Phlyctochytrium planicorne</i>                  | 0.3%            | 88.3%       |
| <i>Lecophagus</i> sp. ATCC 56071                   | 0.3%            | 85.0%       |
| <i>Synchytrium decipiens</i>                       | 0.3%            | 78.0%       |
| <i>Schizothyrium pomi</i>                          | 0.3%            | 82.8%       |
| <i>Fomes fomentarius</i>                           | 0.3%            | 96.1%       |
| <b>TOTAL</b>                                       | <b>94.5%</b>    |             |
